# Supplementary material
Source: ML conference proceedings conference paper supplement (https://openreview.net/forum?id=SnEgcwIjcl5)

Minimal sets plus non-forbidden nodes, rank estimated

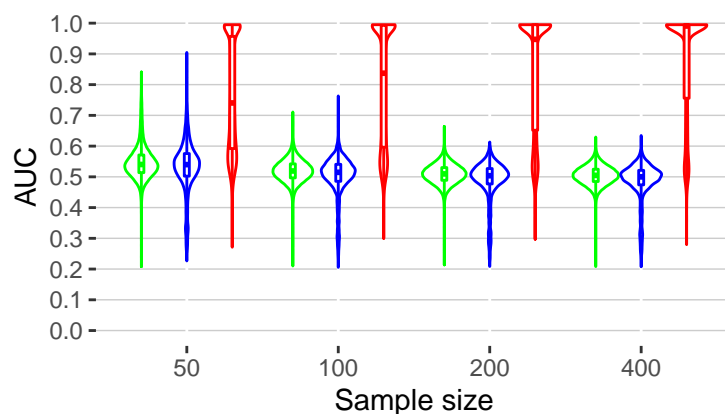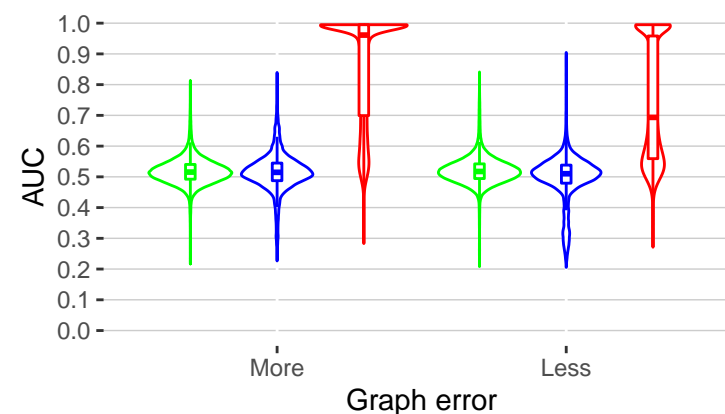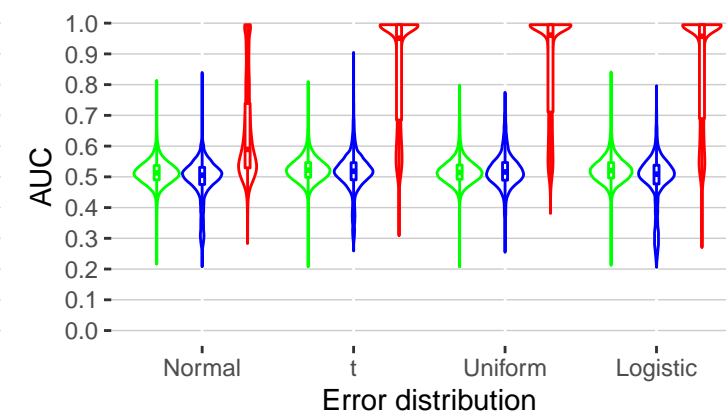

Minimal sets plus non-forbidden nodes, rank not estimated

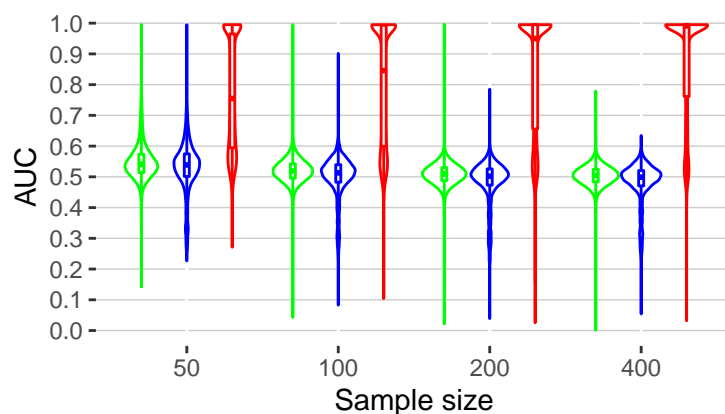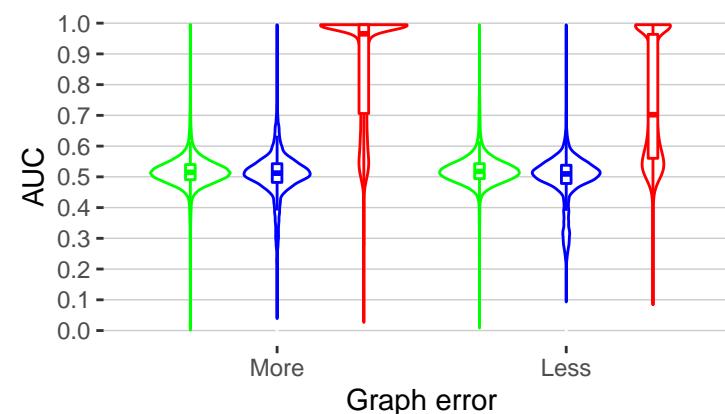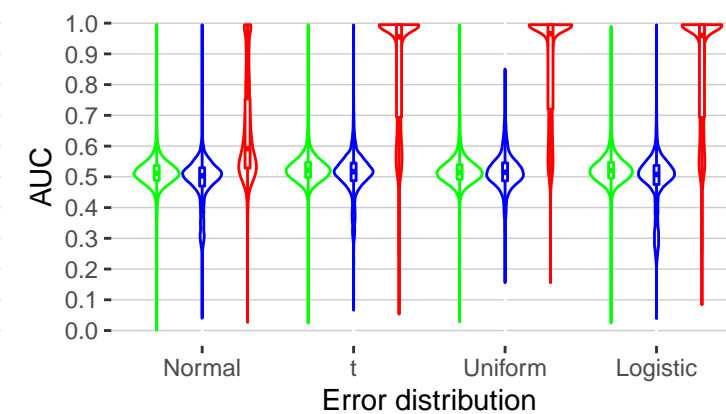

Pruned minimal sets plus non-forbidden nodes, rank estimated

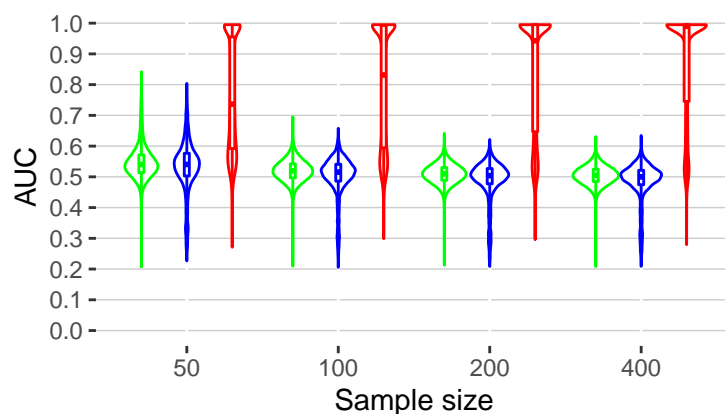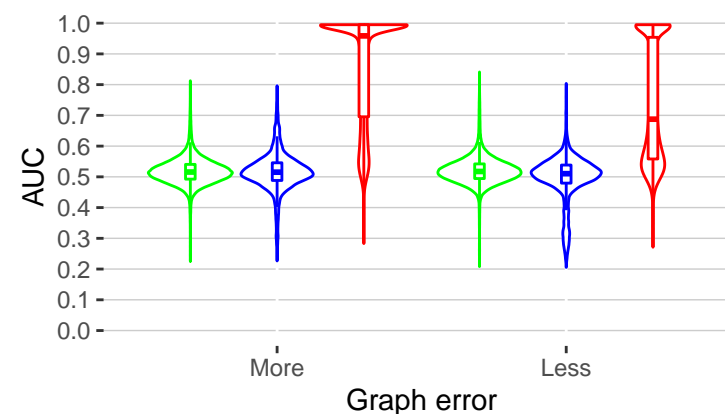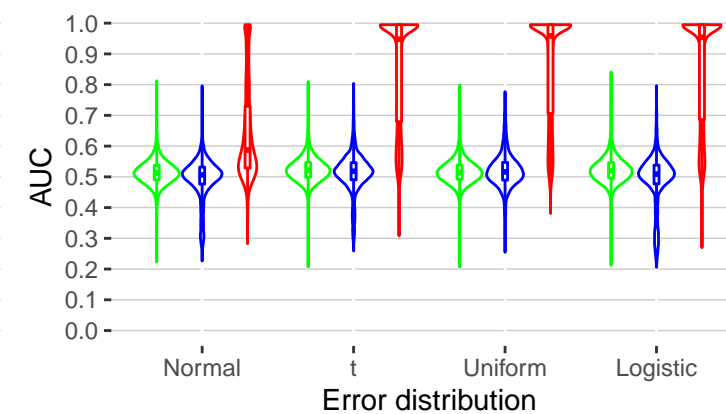

Pruned minimal sets plus non-forbidden nodes, rank not estimated

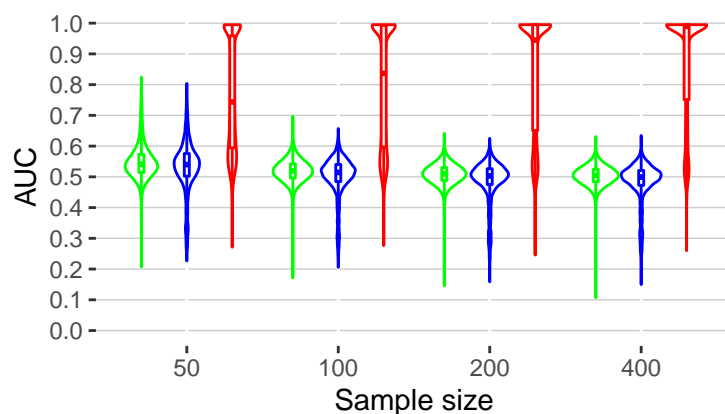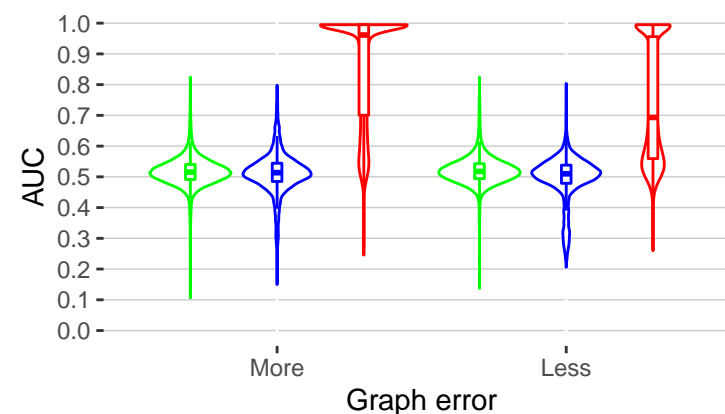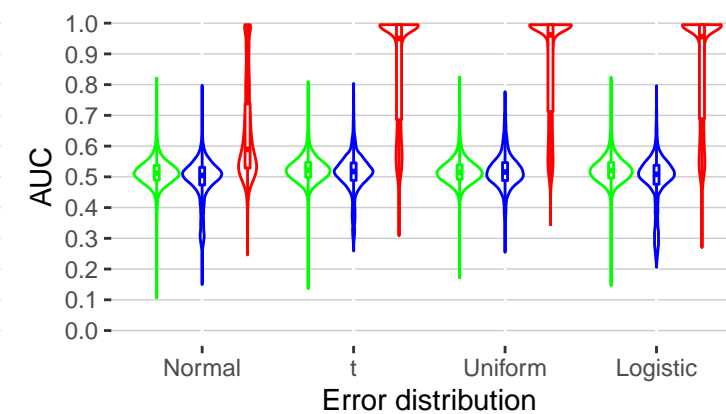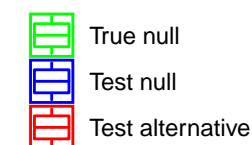

Supplement: supplementary_material [file attachment]
