# Supplementary material
Source: ML conference proceedings conference paper supplement (https://openreview.net/forum?id=SnEgcwIjcl5)

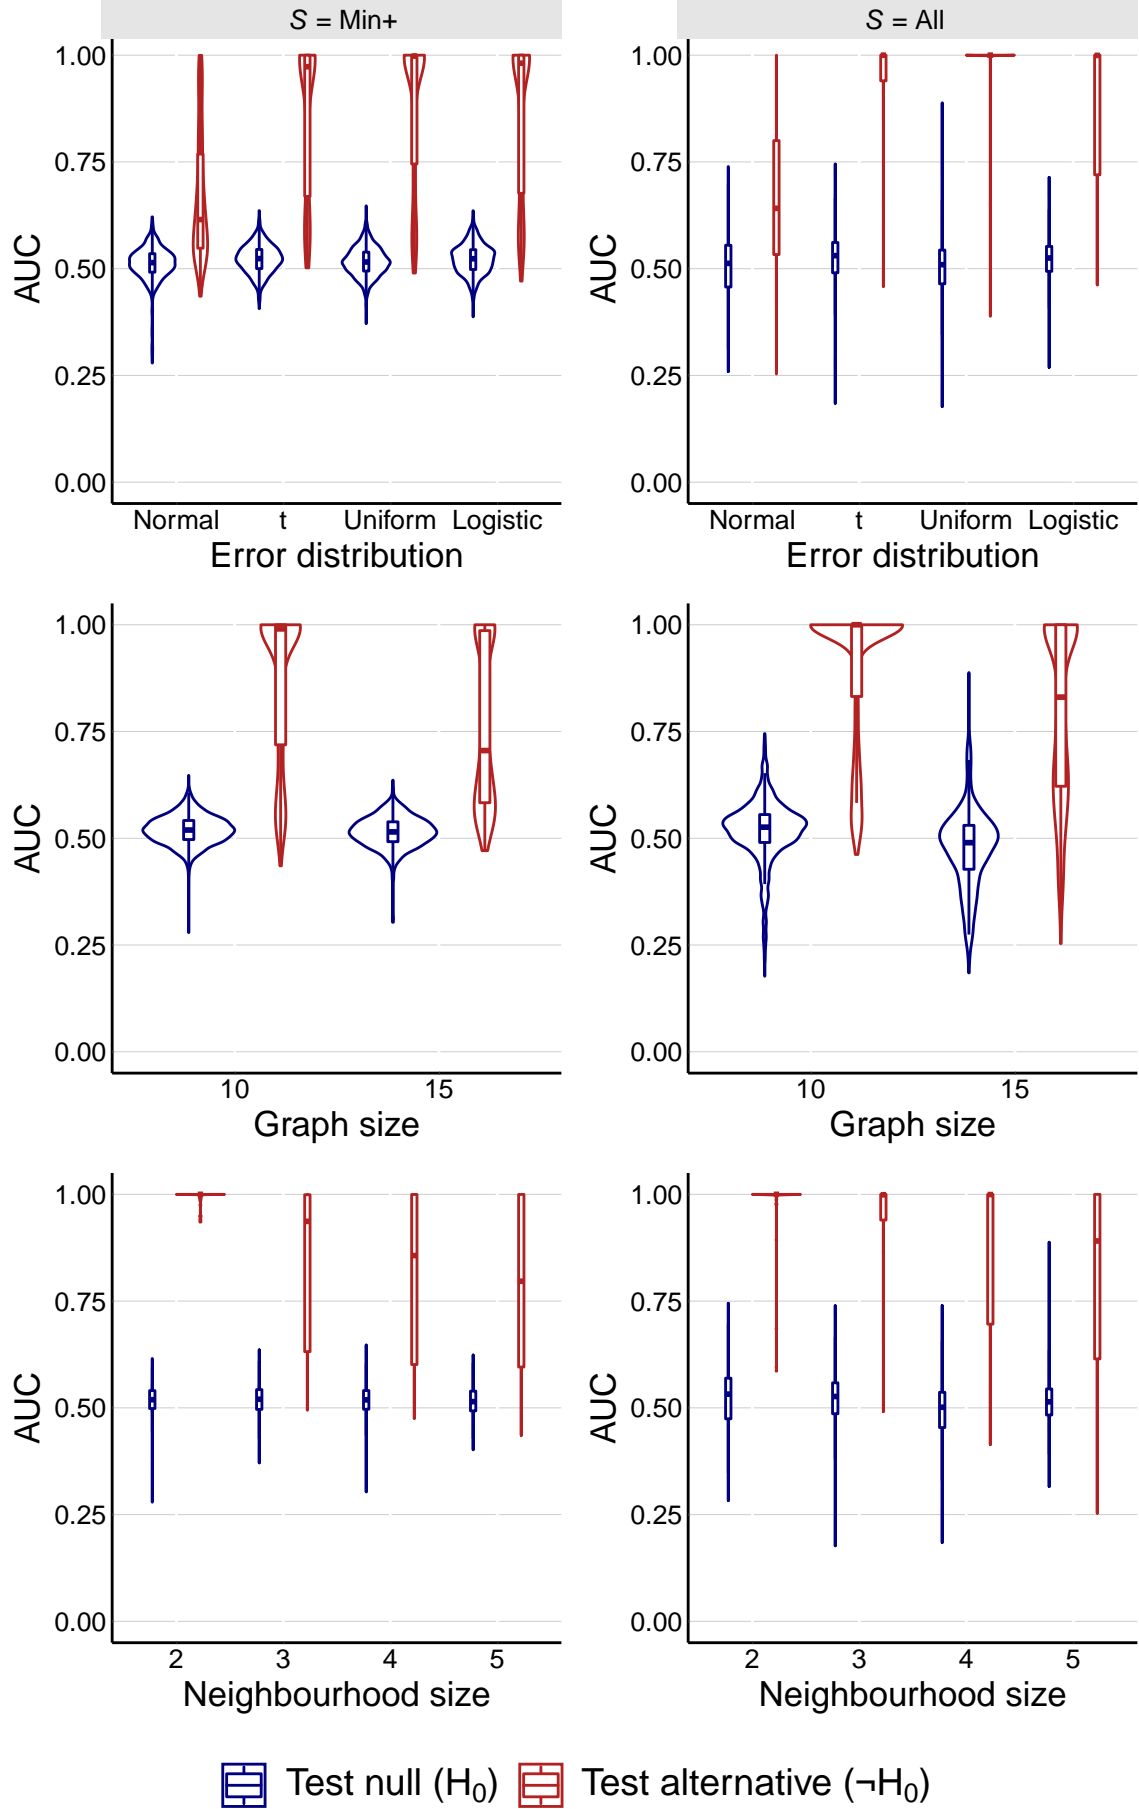

Supplement: supplementary_material [file attachment]

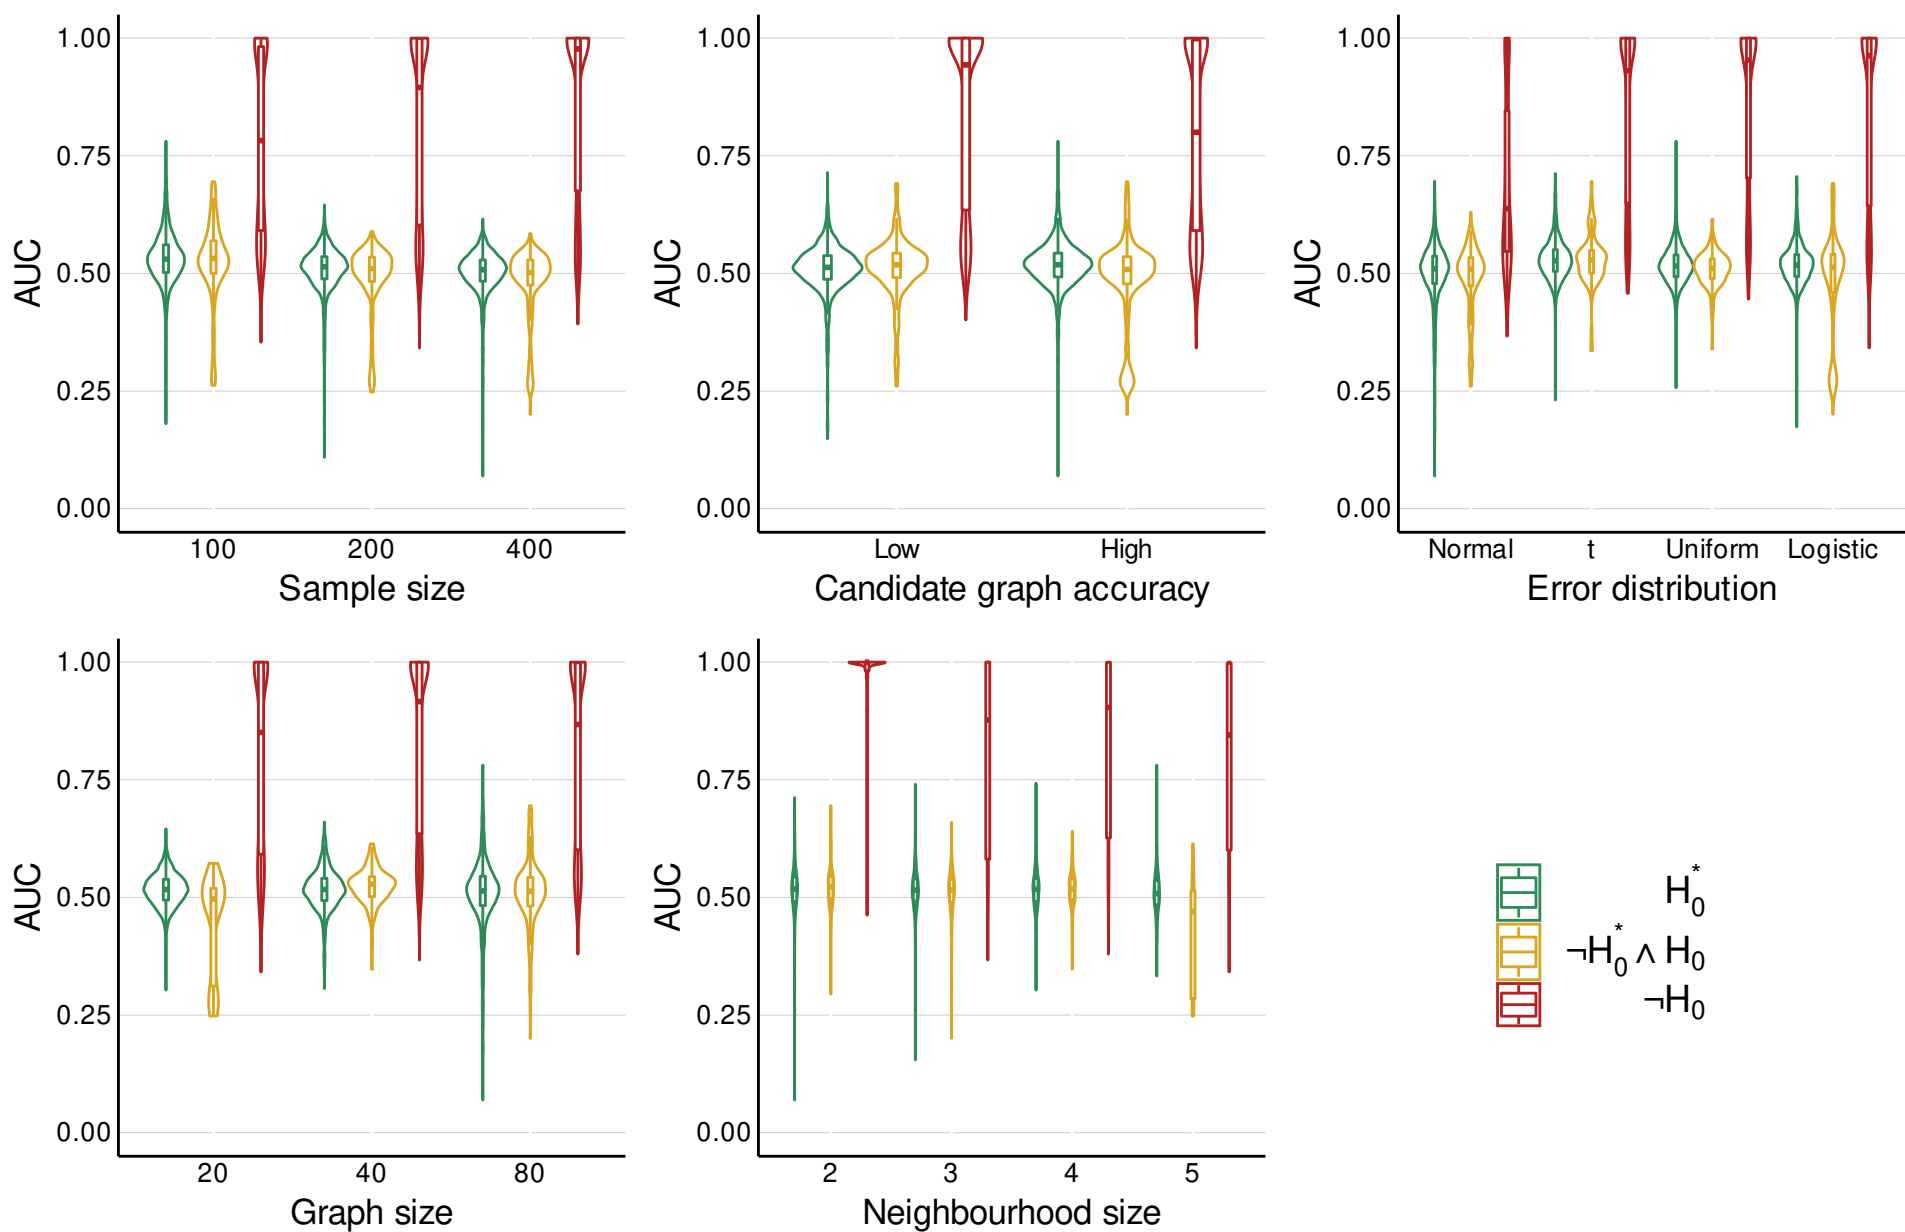

Supplement: supplementary_material [file attachment]

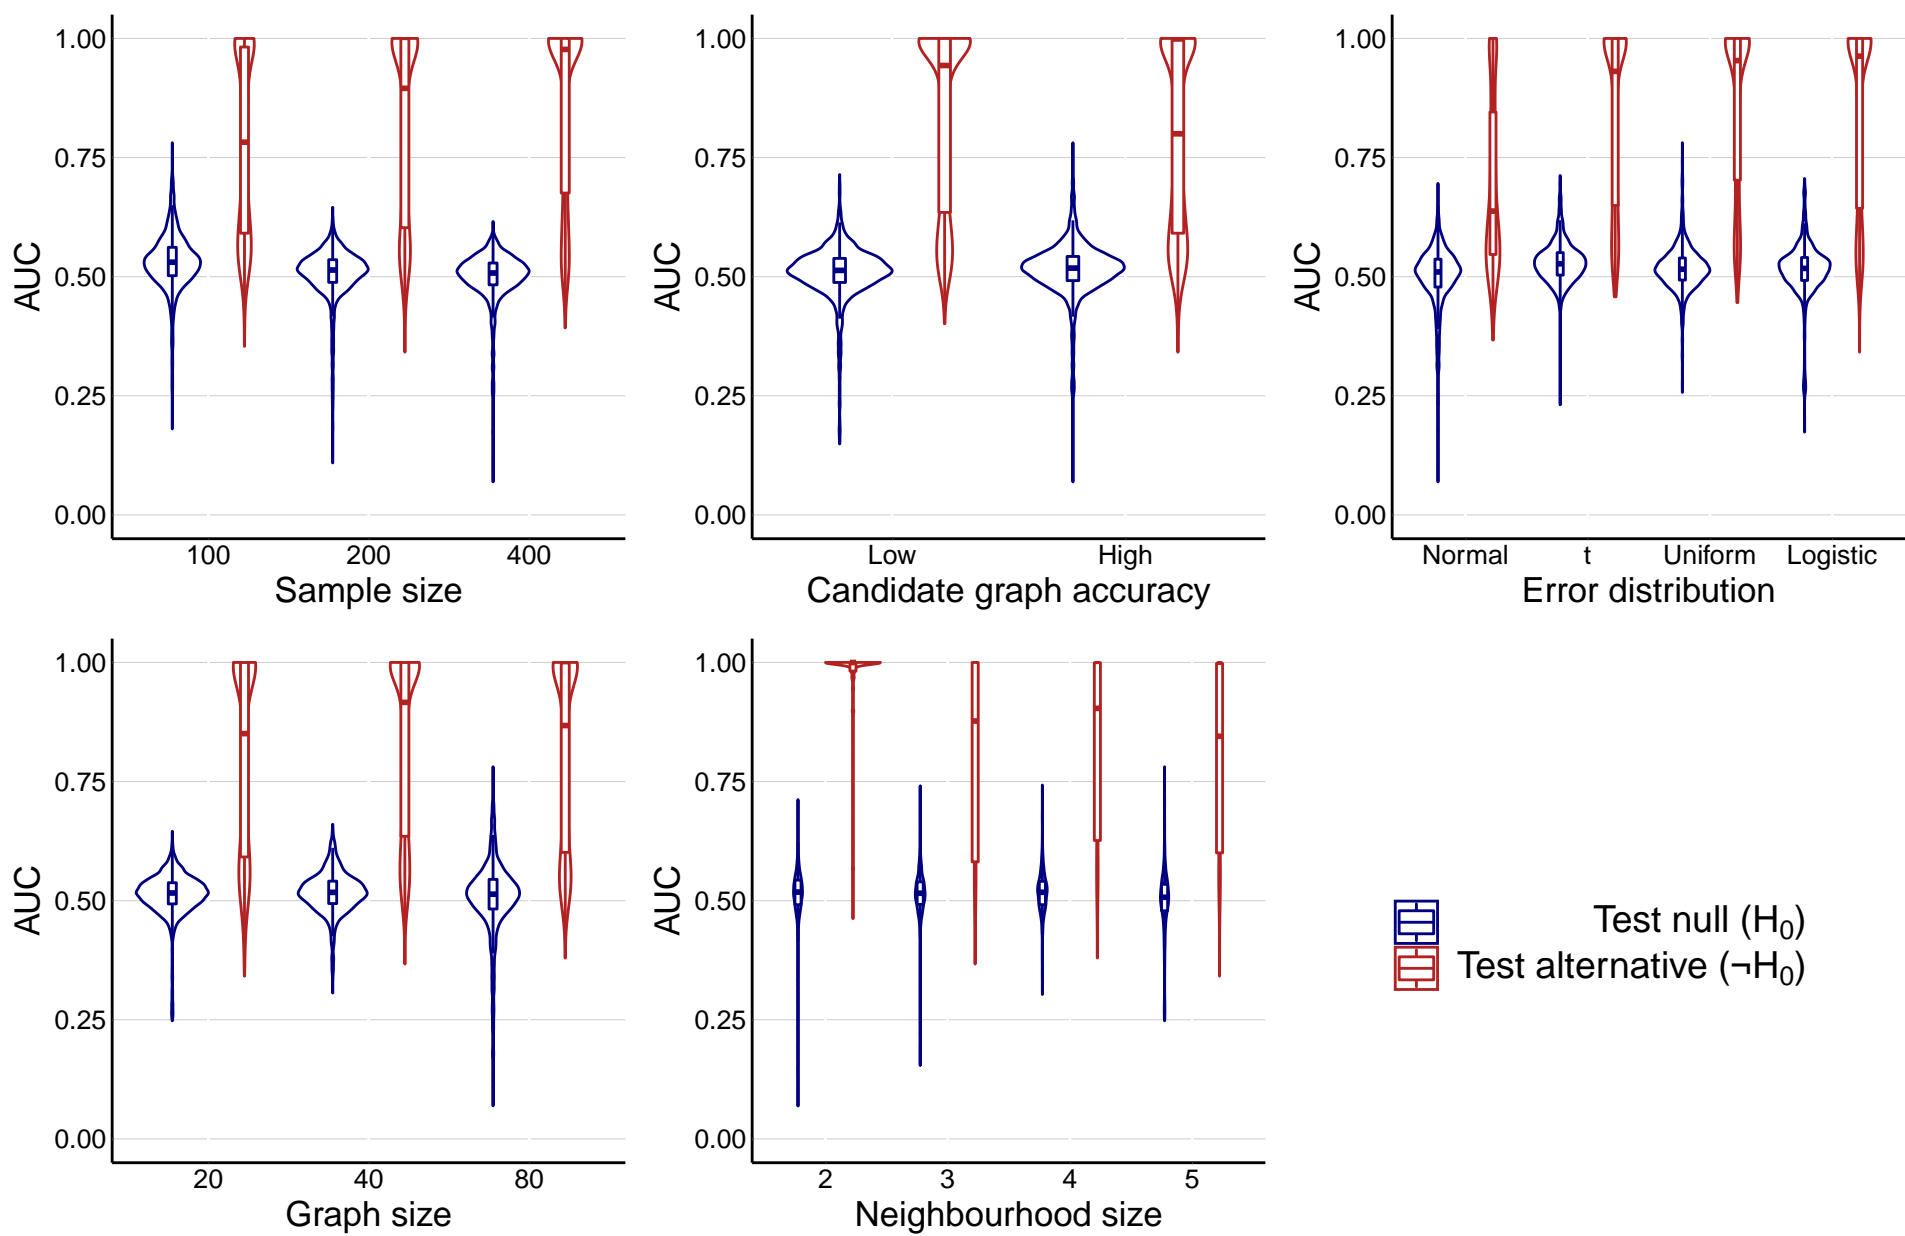

Supplement: supplementary_material [file attachment]

S = Min+

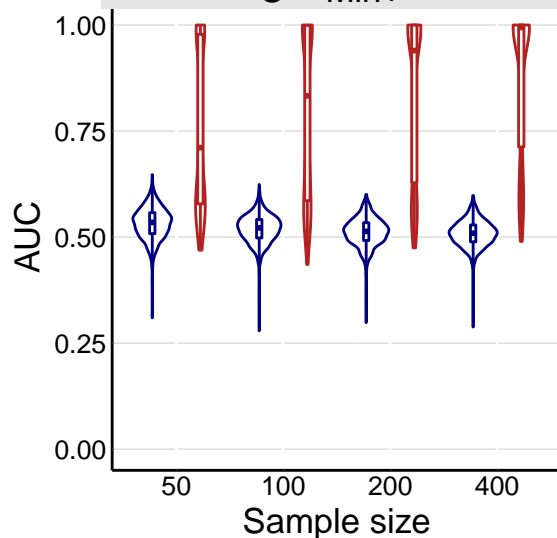

S = All

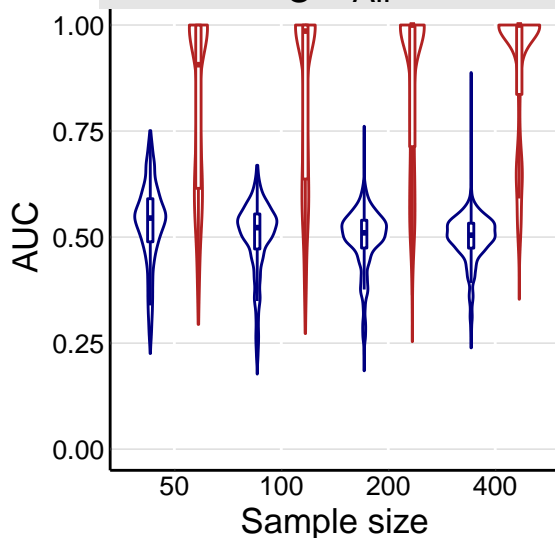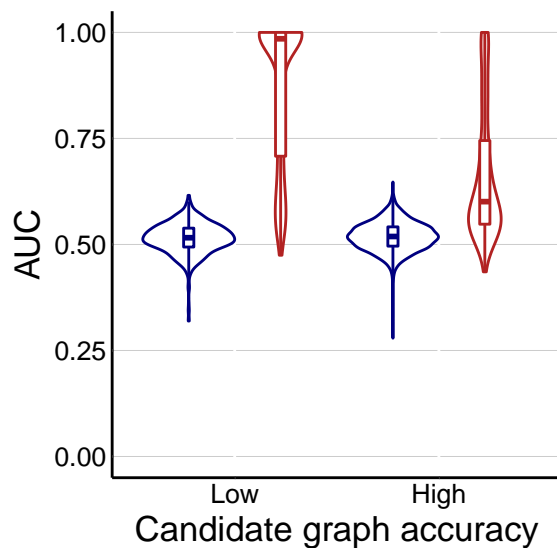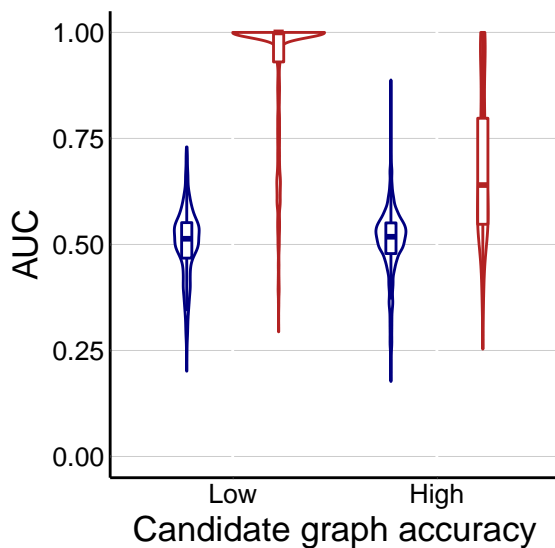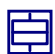

Test null ( $H_0$ )

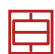

Test alternative ( $\neg H_0$ )

Supplement: supplementary_material [file attachment]

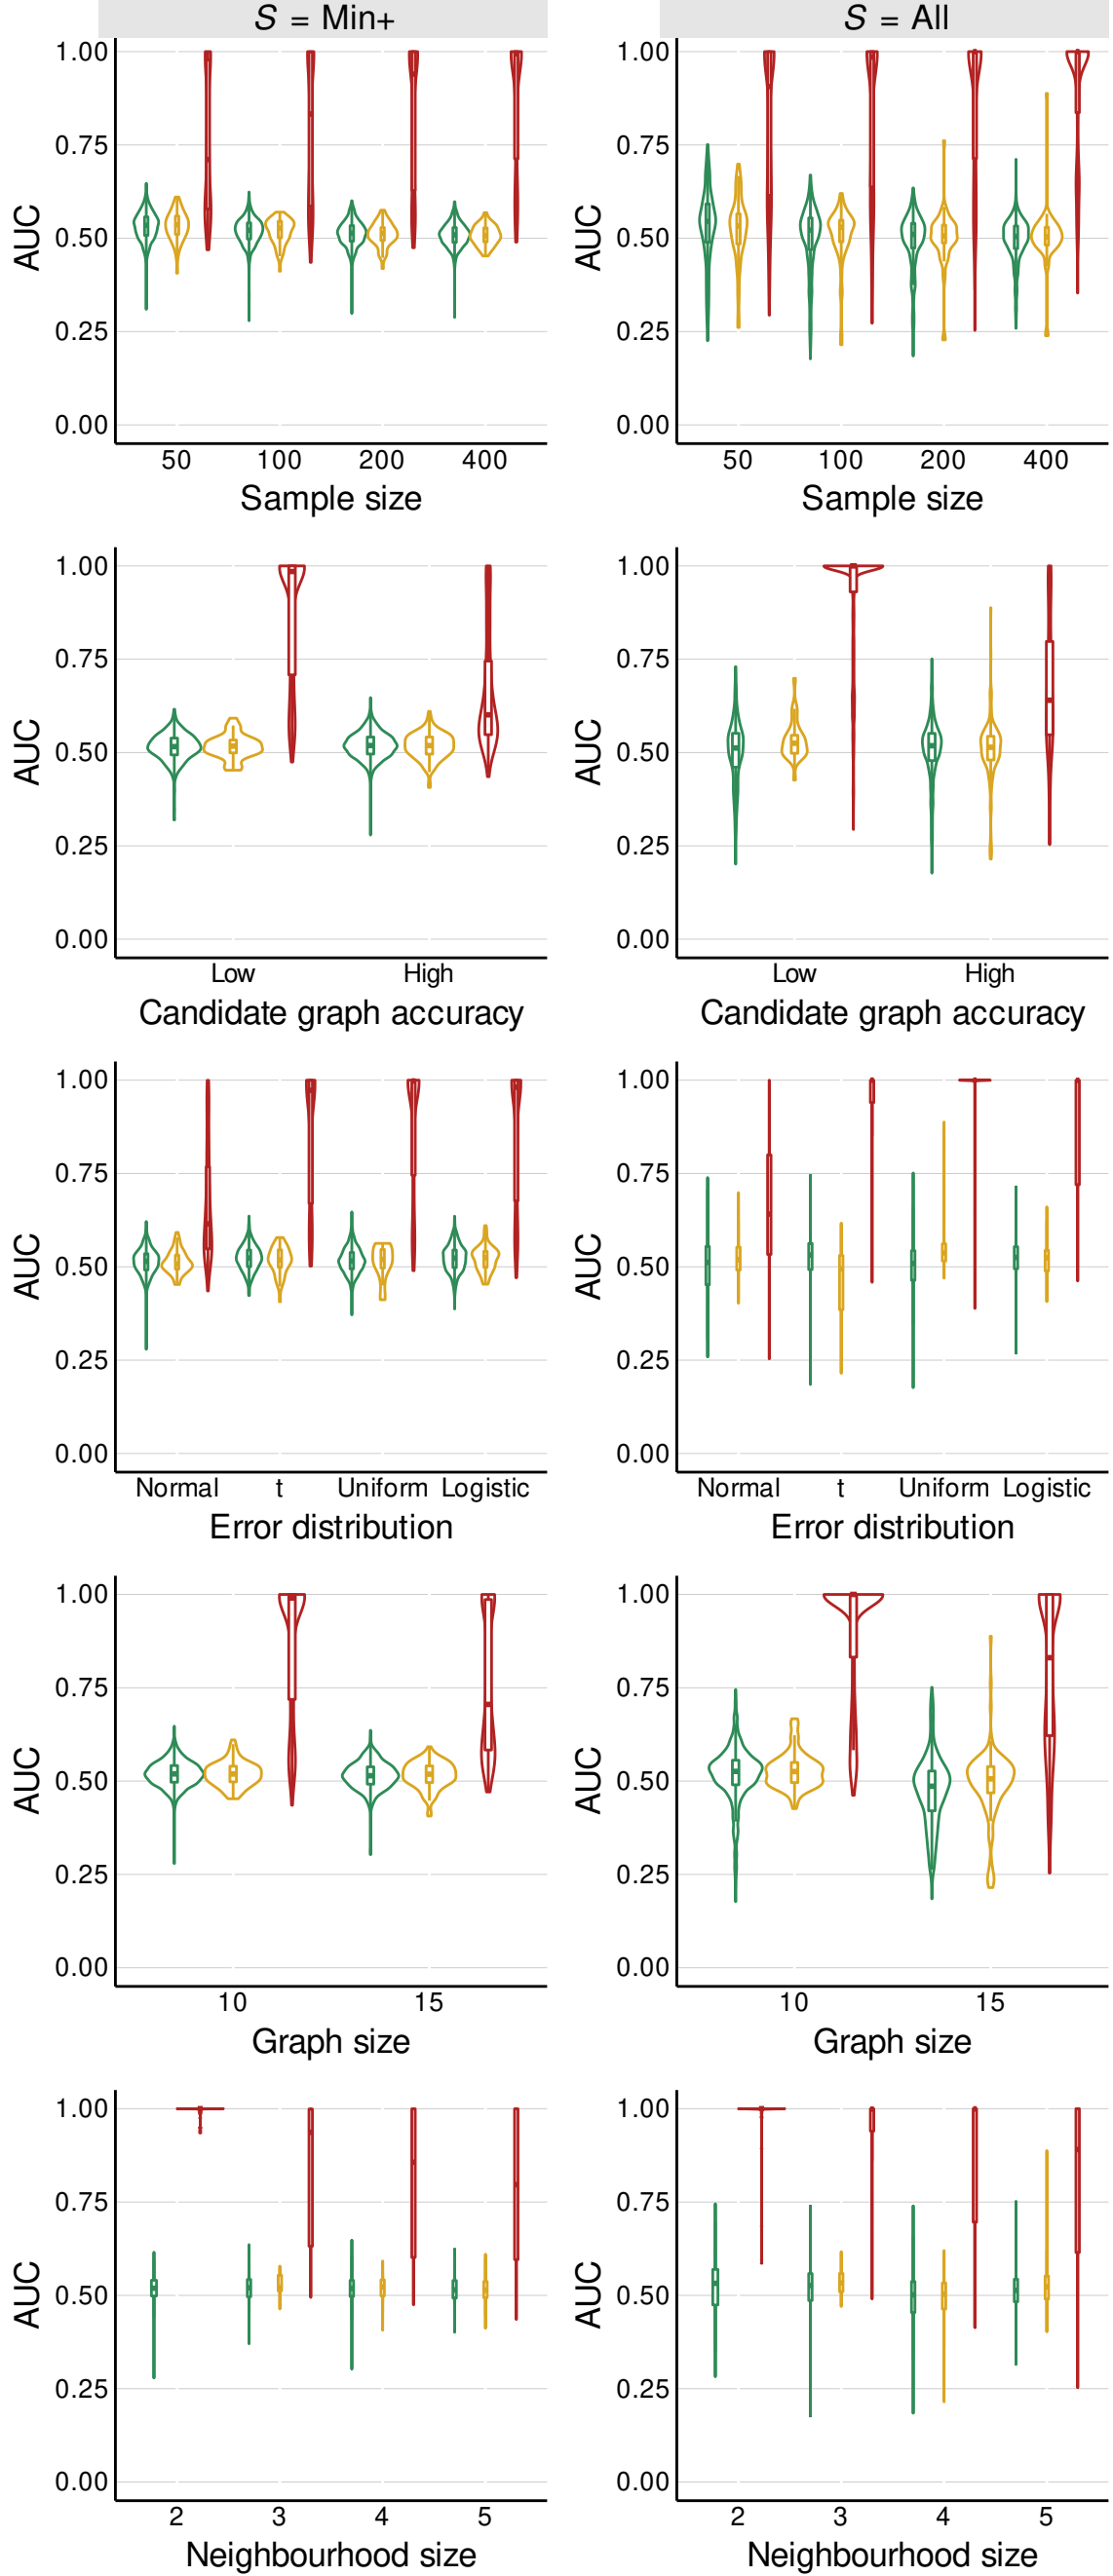

$H_0^*$ 
 $\neg H_0^* \wedge H_0$ 
 $\neg H_0$

Supplement: supplementary_material [file attachment]

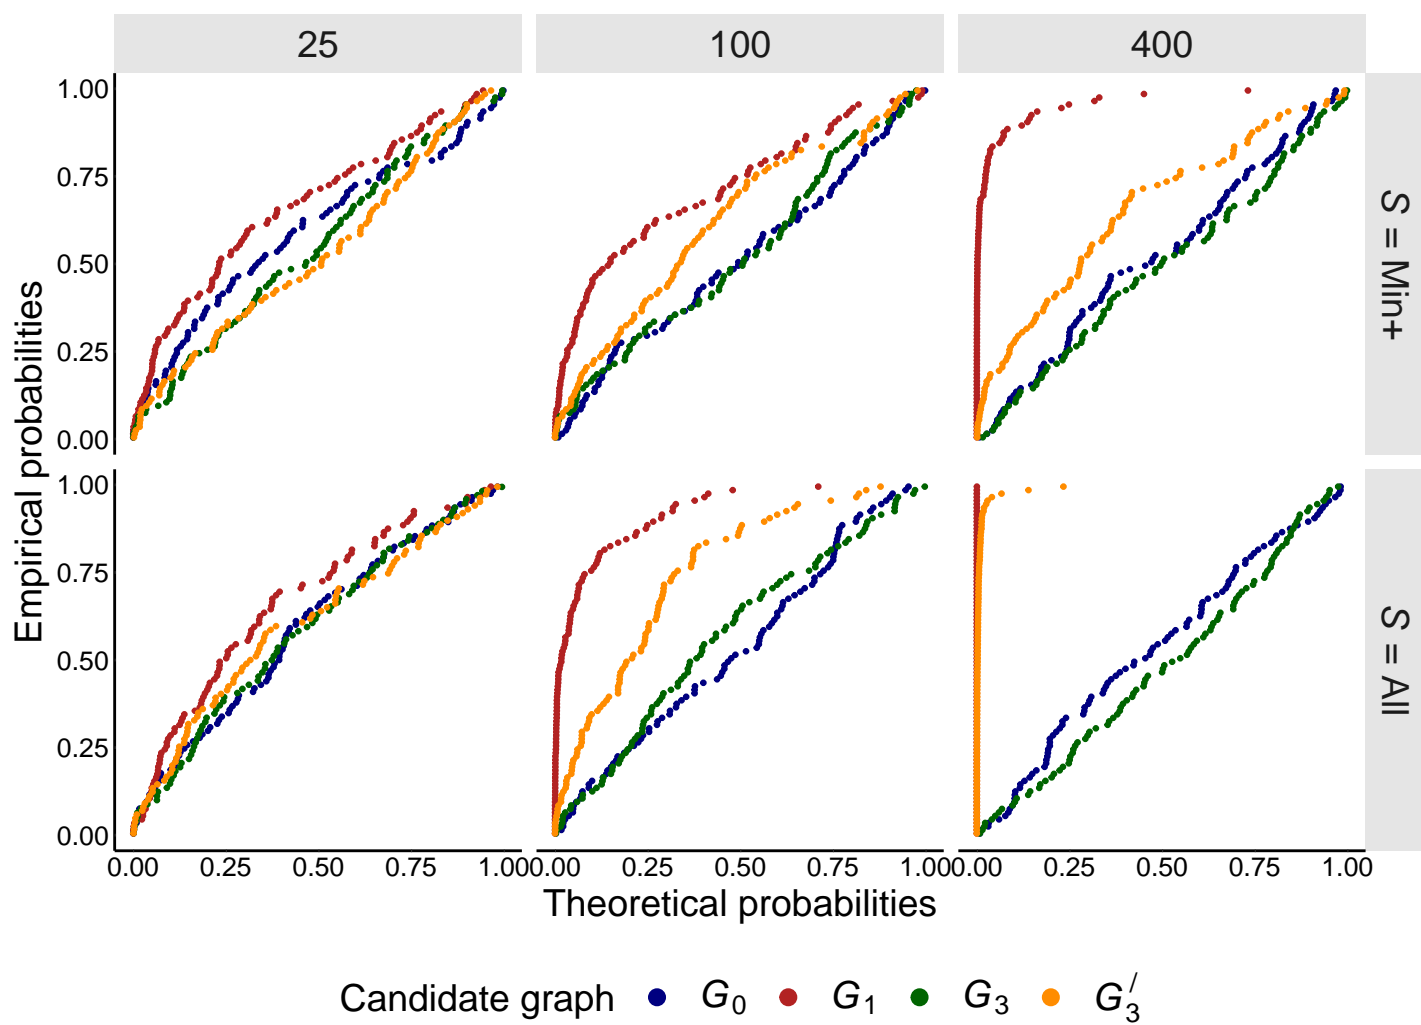

Supplement: supplementary_material [file attachment]
